# Supplementary material for: Ultrahigh cycling stability and rate capability of ZnFe2O4@graphene hybrid anode prepared through a facile syn-graphenization strategy
Source: Royal Society of Chemistry journal article supplement (doi:10.1039/c5nj02570b), 2016-01-01
Supplement: c5nj02570b1.pdf [file c5nj02570b1.pdf]

## Electronic Supplementary Information (ESI) for New Journal of Chemistry

### Ultrahigh Cycling Stability and Rate Capability of ZnFe<sub>2</sub>O<sub>4</sub>@Graphene Hybrid Anode Prepared through a Facile Syn-graphenization Strategy

Lei Liu<sup>a</sup>, Rui Gao<sup>a</sup>, Limei Sun<sup>b\*</sup>, Songbai Han<sup>b</sup>, Dongfeng Chen<sup>b</sup>, Zhongbo Hu<sup>a</sup>, Xiangfeng Liu<sup>a\*</sup>

<sup>a</sup> College of Materials Science and Opto-Electronic Technology, University of Chinese Academy of Sciences, Beijing 100049, China

<sup>b</sup> Department of Nuclear Physics, China Institute of Atomic Energy, Beijing 102413, China

\*E-mail: liuxf@ucas.ac.cn. Tel.: +86 10 8825 6840.

\*E-mail: sunlm@ciae.ac.cn Tel.: +86 10 6935 8741.

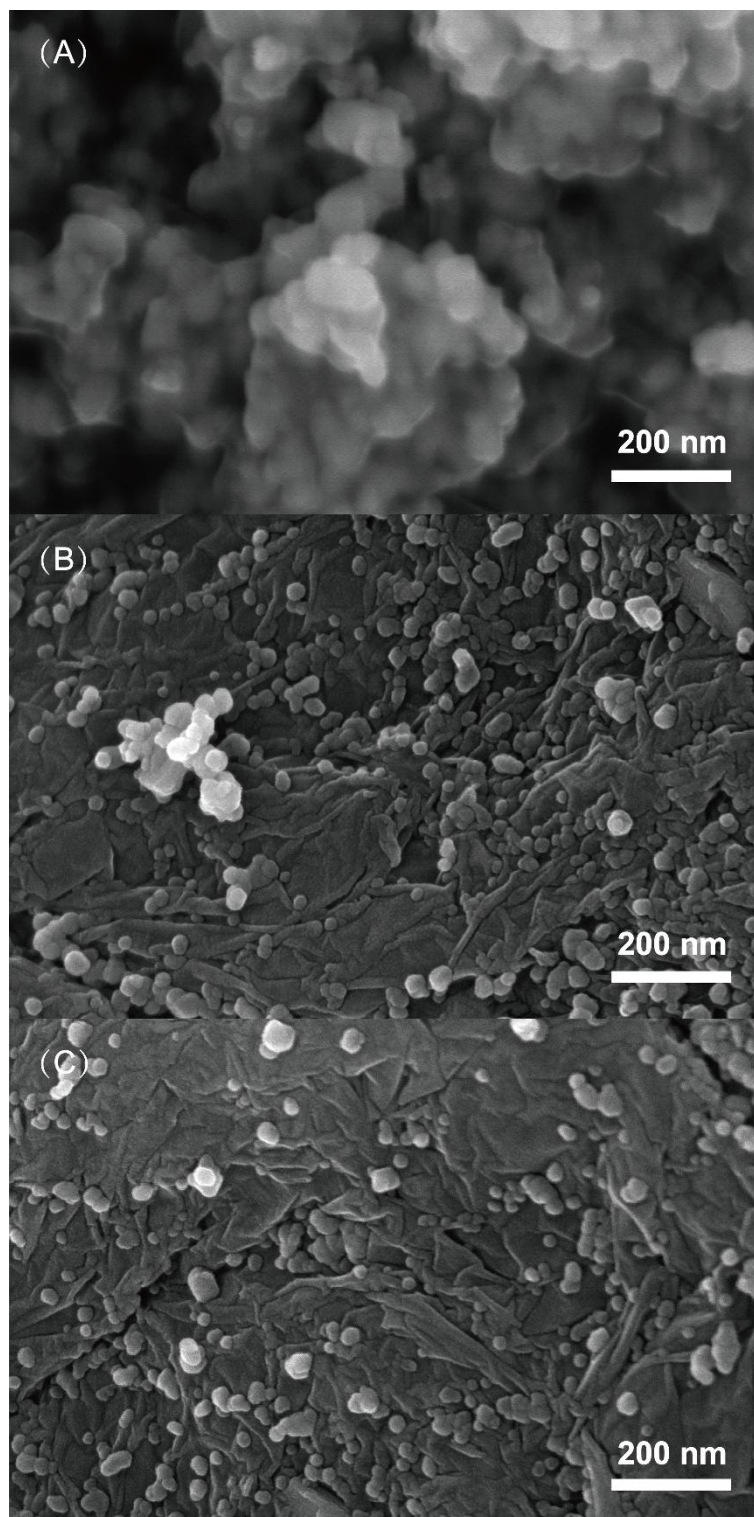

**Figure S1.** SEM images of the materials. (A)ZnFe<sub>2</sub>O<sub>4</sub>; (B)ZnFe<sub>2</sub>O<sub>4</sub>-RGO1; (C)ZnFe<sub>2</sub>O<sub>4</sub>-RGO2.

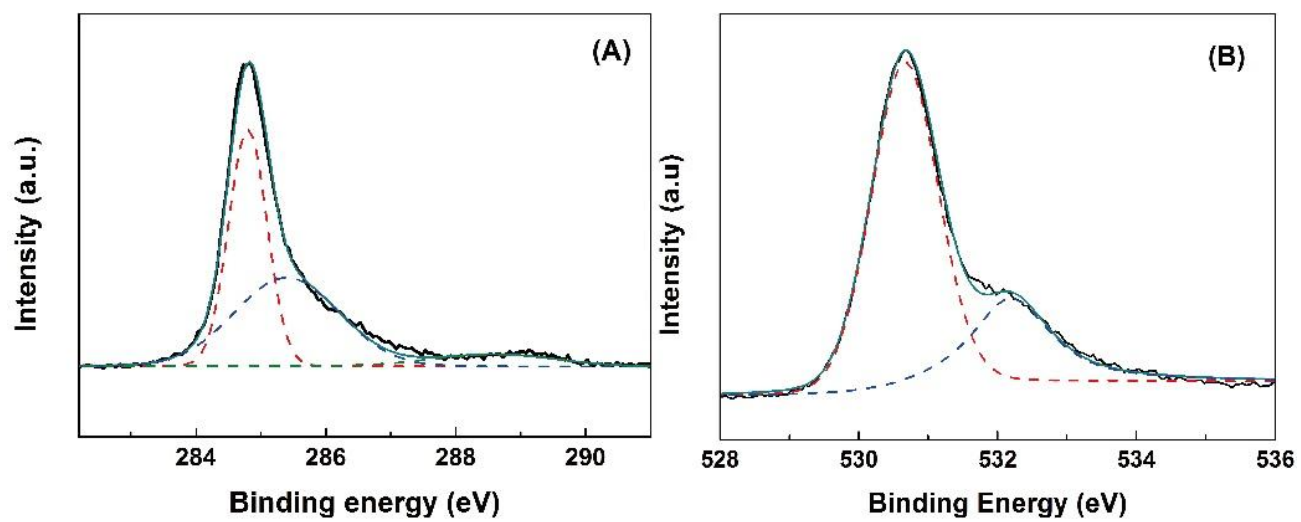

Figure S2. XPS spectra of C 1s (A) and O 1s of ZnFe<sub>2</sub>O<sub>4</sub>-RGO2.

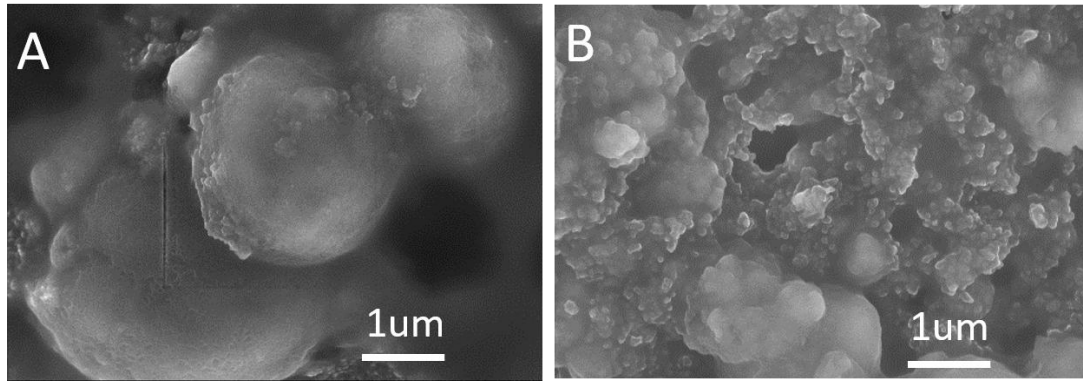

**Figure S3.** SEM images of samples after 20 cycles of discharge and charge. (A)  $\text{ZnFe}_2\text{O}_4$ ; (B)  $\text{ZnFe}_2\text{O}_4\text{-RGO}_2$
